# Supplementary material for: Apogossypol-mediated reorganisation of the endoplasmic reticulum antagonises mitochondrial fission and apoptosis
Source: PubMed Central journal article supplement (PMC6614446; doi:10.1038/s41419-019-1759-y), 2019-07-08

Figure S1

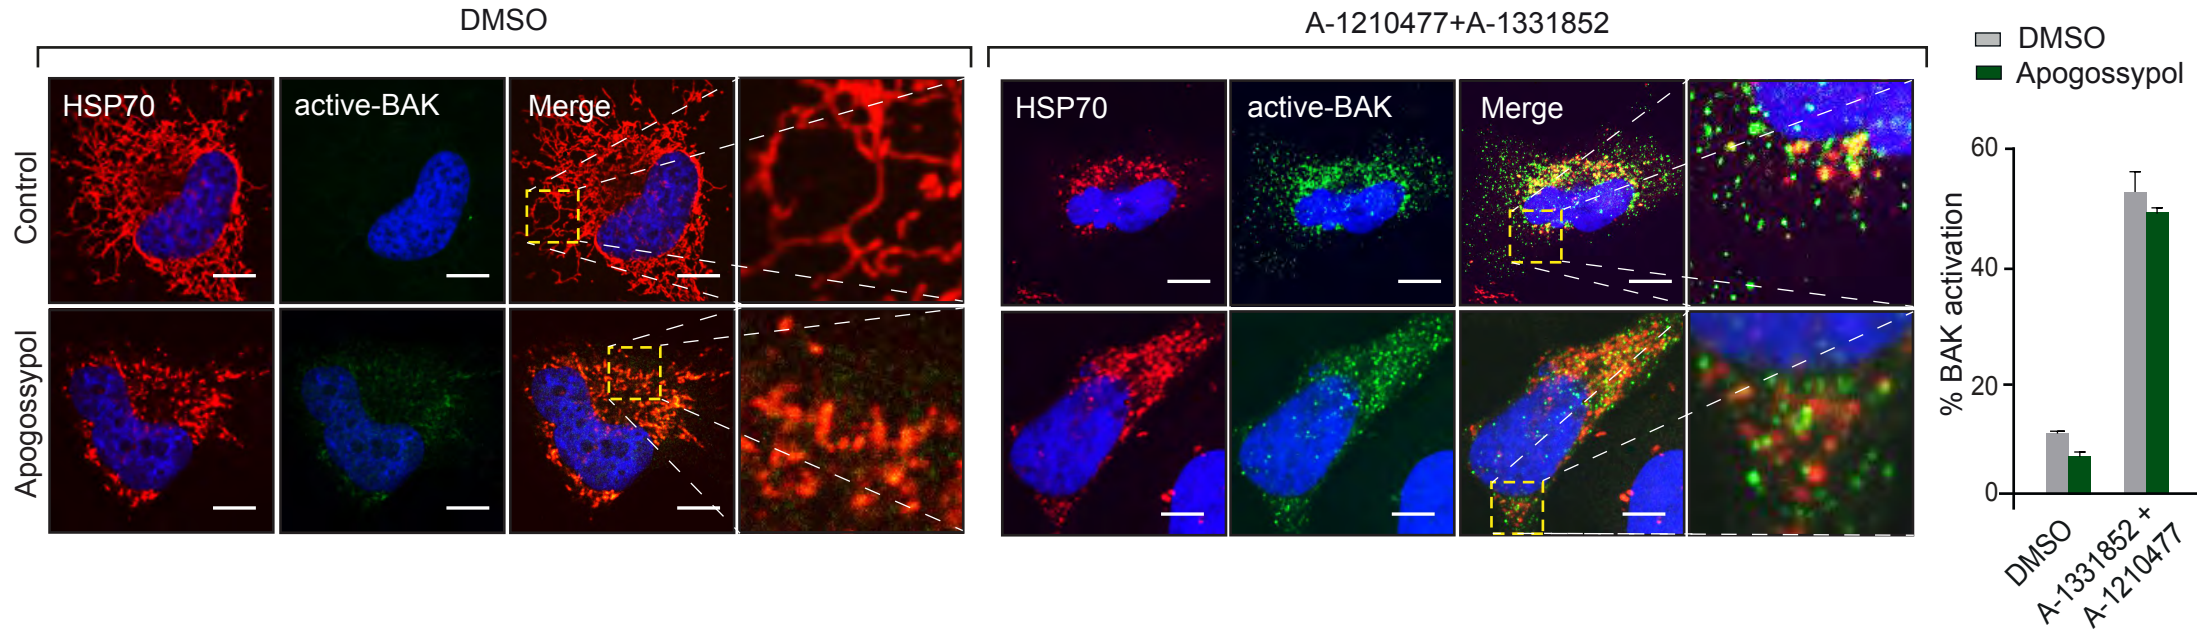

Supplement: 41419_2019_1759_MOESM1_ESM.pdf [file 41419_2019_1759_MOESM1_ESM.pdf]
